# Supplementary material for: Impact Force and Velocities for Kicking Strikes in Combat Sports: A Literature Review
Source: MDPI journal article supplement (doi:10.3390/sports12030074), 2024-03-06
Supplement: s1 [file s1]

**Table S1.** Search strategy

The below search terms were used in the following electronic databases: Academic Search Premier, The Allied and Complementary Medicine Database, CINAHL Plus, MEDLINE, SPORTDiscus, Scopus and Web Of Science. Search was limited to articles in English language and published in peer reviewed publication.

| Database                                              | Search strategy                                                                                                                                                                                                                                                                                                                                                   |
|-------------------------------------------------------|-------------------------------------------------------------------------------------------------------------------------------------------------------------------------------------------------------------------------------------------------------------------------------------------------------------------------------------------------------------------|
| SCOPUS                                                | ( TITLE-ABS-KEY ( "martial arts" OR "combat sports" OR "combat sport" OR karate OR kickboxing OR kick-boxing OR "kick boxing" OR "mixed martial arts" OR mma OR taekwondo OR tkd OR "Tae-kwon-do" ) AND TITLE-ABS-KEY ( force OR velocity OR impact ) AND TITLE-ABS-KEY ( kick* ) ) AND ( LIMIT-TO ( DOCTYPE , "ar" ) ) AND ( LIMIT-TO ( LANGUAGE , "English" ) ) |
| Web Of Science - all databases                        | "martial arts" OR "combat sports" OR "combat sport" OR karate OR kickboxing OR kick-boxing OR "kick boxing" OR "mixed martial arts" OR mma OR taekwondo OR TKD OR "Tae-kwon-do" (Topic) and force OR velocity OR impact (Topic) and kick* (Topic) and Preprint Citation Index (Exclude – Database) and Article (Document Types) and English (Languages)           |
| CINAHL Plus                                           | ( "martial arts" OR "combat sports" OR "combat sport" OR karate OR kickboxing OR kick-boxing OR "kick boxing" OR "mixed martial arts" OR mma OR taekwondo OR TKD OR "Tae-kwon-do" ) AND ( force OR velocity OR power OR impact ) AND kick*<br><br>Limiters: English language, Peer reviewed                                                                       |
| AMED - The Allied and Complementary Medicine Database | ( "martial arts" OR "combat sports" OR "combat sport" OR karate OR kickboxing OR kick-boxing OR "kick boxing" OR "mixed martial arts" OR mma OR taekwondo OR TKD OR "Tae-kwon-do" ) AND ( force OR velocity OR power OR impact ) AND kick*<br><br>Limiters: English language, Peer reviewed                                                                       |
| Academic Search Premier                               | ( "martial arts" OR "combat sports" OR "combat sport" OR karate OR kickboxing OR kick-boxing OR "kick boxing" OR "mixed martial arts" OR mma OR taekwondo OR TKD OR "Tae-kwon-do" ) AND ( force OR velocity OR power OR impact ) AND kick*<br><br>Limiters: English language, Peer reviewed                                                                       |
| MEDLINE                                               | ( "martial arts" OR "combat sports" OR "combat sport" OR karate OR kickboxing OR kick-boxing OR "kick boxing" OR "mixed martial arts" OR mma OR taekwondo OR TKD OR "Tae-kwon-do" ) AND ( force OR velocity OR power OR impact ) AND kick*<br><br>Limiters: English language, Peer reviewed                                                                       |
| SPORTDiscus                                           | ( "martial arts" OR "combat sports" OR "combat sport" OR karate OR kickboxing OR kick-boxing OR "kick boxing" OR "mixed martial arts" OR mma OR taekwondo OR TKD OR "Tae-kwon-do" ) AND ( force OR velocity OR power OR impact ) AND kick*<br><br>Limiters: English language, Peer reviewed                                                                       |

**Table S2.** Appraisal tool for Cross-sectional Studies (AXIS) assessment for included studies

| Question                           | 1 | 2 | 3 | 4 | 5 | 6 | 7 | 8 | 9 | 10 | 11 | 12 | 13 | 14 | 15 | 16 | 17 | 18 | 19 | 20 | $\Sigma$ | %   |
|------------------------------------|---|---|---|---|---|---|---|---|---|----|----|----|----|----|----|----|----|----|----|----|----------|-----|
| Aandahl et al., 2018 [28]          | Y | Y | N | Y | Y | Y | - | Y | Y | Y  | Y  | Y  | -  | -  | Y  | Y  | Y  | N  | N  | Y  | 15       | 88  |
| Aragones et al., 2018 [83]         | Y | Y | N | Y | Y | Y | - | Y | Y | Y  | Y  | Y  | -  | -  | N  | Y  | Y  | N  | N  | Y  | 14       | 82  |
| Busko et al., 2016 [104]           | Y | Y | N | Y | Y | Y | - | Y | N | Y  | Y  | Y  | -  | -  | N  | Y  | Y  | N  | N  | Y  | 13       | 76  |
| Busko and Nikolaidis, 2018 [103]   | Y | Y | N | Y | Y | Y | - | Y | Y | Y  | Y  | Y  | -  | -  | N  | Y  | Y  | N  | N  | Y  | 14       | 82  |
| Branco et al., 2019 [58]           | Y | Y | N | Y | Y | Y | - | Y | Y | Y  | Y  | Y  | -  | -  | N  | Y  | Y  | N  | N  | Y  | 14       | 82  |
| Chang et al., 2021 [59]            | Y | Y | N | Y | Y | Y | - | Y | Y | Y  | Y  | Y  | -  | -  | N  | Y  | Y  | Y  | N  | Y  | 15       | 88  |
| Cheng et al., 2015 [97]            | Y | Y | N | Y | Y | Y | - | Y | Y | Y  | Y  | Y  | -  | -  | N  | Y  | Y  | N  | N  | Y  | 14       | 82  |
| Daniel and Razvan-Liviu, 2014 [60] | Y | Y | N | Y | Y | Y | - | Y | N | Y  | N  | Y  | -  | -  | N  | Y  | Y  | N  | Y  | N  | 10       | 59  |
| Di Bacco et al., 2020 [84]         | Y | Y | N | Y | Y | Y | - | Y | Y | Y  | Y  | Y  | -  | -  | N  | Y  | Y  | Y  | N  | Y  | 15       | 88  |
| Diniz et al., 2021 [26]            | Y | Y | Y | Y | Y | Y | - | Y | Y | Y  | Y  | Y  | -  | -  | N  | Y  | Y  | Y  | N  | Y  | 16       | 94  |
| Dworak et al., 1998 [27]           | Y | Y | N | Y | Y | Y | - | Y | Y | N  | N  | Y  | -  | -  | N  | Y  | Y  | N  | Y  | N  | 10       | 59  |
| Estevan et al., 2011 [51]          | Y | Y | N | Y | Y | Y | - | Y | Y | Y  | Y  | Y  | -  | -  | Y  | Y  | Y  | N  | N  | Y  | 15       | 88  |
| Estevan et al., 2012 [48]          | Y | Y | N | Y | Y | Y | - | Y | Y | Y  | Y  | Y  | -  | -  | Y  | Y  | Y  | Y  | N  | Y  | 16       | 94  |
| Estevan et al., 2013 [50]          | Y | Y | N | Y | Y | Y | - | Y | Y | Y  | Y  | Y  | -  | -  | Y  | Y  | Y  | N  | N  | Y  | 15       | 88  |
| Estevan and Falco, 2013 [44]       | Y | Y | Y | Y | Y | Y | - | Y | Y | Y  | Y  | Y  | -  | -  | Y  | Y  | Y  | Y  | N  | Y  | 16       | 94  |
| Estevan et al., 2014 [56]          | Y | Y | N | Y | Y | Y | - | Y | Y | Y  | Y  | Y  | -  | -  | Y  | Y  | Y  | Y  | N  | Y  | 15       | 88  |
| Estevan et al., 2015 [43]          | Y | Y | Y | Y | Y | Y | - | Y | Y | Y  | Y  | Y  | -  | -  | Y  | Y  | Y  | Y  | N  | Y  | 17       | 100 |
| Falco et al., 2009 [49]            | Y | Y | N | Y | Y | Y | - | Y | N | Y  | Y  | Y  | -  | -  | Y  | Y  | Y  | Y  | N  | Y  | 15       | 88  |
| Falco et al., 2013 [52]            | Y | Y | N | Y | Y | Y | - | Y | Y | Y  | Y  | Y  | -  | -  | Y  | Y  | Y  | Y  | N  | Y  | 16       | 94  |
| Fife et al., 2013 [75]             | Y | Y | N | Y | Y | Y | - | Y | N | Y  | Y  | Y  | -  | -  | N  | Y  | Y  | Y  | N  | Y  | 14       | 82  |
| Fife et al., 2013a [76]            | Y | Y | N | Y | Y | Y | - | Y | Y | Y  | Y  | Y  | -  | -  | N  | Y  | Y  | Y  | N  | Y  | 15       | 88  |
| Gavagan and Sayers, 2017 [24]      | Y | Y | N | Y | Y | Y | - | Y | Y | Y  | Y  | Y  | -  | -  | N  | Y  | Y  | Y  | N  | Y  | 15       | 88  |
| Goethel et al., 2019 [45]          | Y | Y | Y | Y | Y | Y | - | Y | Y | Y  | Y  | Y  | -  | -  | N  | Y  | Y  | N  | N  | N  | 14       | 82  |
| Gorski et al., 2014 [113]          | Y | Y | N | Y | Y | Y | - | Y | Y | N  | N  | Y  | -  | -  | N  | Y  | Y  | N  | N  | N  | 11       | 65  |
| Gorski and Orysiak, 2019 [105]     | Y | Y | N | Y | Y | Y | - | Y | Y | Y  | Y  | Y  | -  | -  | N  | Y  | Y  | N  | N  | Y  | 14       | 82  |
| Goulart et al., 2017 [32]          | Y | Y | N | Y | Y | Y | - | Y | N | Y  | Y  | Y  | -  | -  | N  | Y  | Y  | N  | N  | Y  | 13       | 76  |
| Grymanowski et al., 2019 [85]      | Y | Y | N | Y | Y | Y | - | Y | Y | N  | N  | Y  | -  | -  | N  | N  | Y  | N  | Y  | Y  | 10       | 59  |
| Guo, 2013 [23]                     | Y | y | N | Y | Y | Y | - | Y | Y | N  | N  | Y  | -  | -  | N  | Y  | Y  | N  | Y  | N  | 10       | 59  |
| Huang et al., 2022 [61]            | Y | Y | N | Y | Y | Y | - | Y | Y | Y  | Y  | Y  | -  | -  | N  | Y  | Y  | Y  | N  | Y  | 15       | 88  |
| Ibrahim et al., 2022 [86]          | Y | Y | N | Y | Y | Y | - | Y | Y | Y  | Y  | Y  | -  | -  | N  | Y  | Y  | N  | N  | Y  | 14       | 82  |
| Jakubiak and Saunders, 2008 [29]   | Y | Y | N | Y | Y | Y | - | Y | N | Y  | Y  | Y  | -  | -  | N  | Y  | Y  | N  | Y  | Y  | 12       | 71  |
| Jandacka et al., 2013 [53]         | Y | Y | N | Y | Y | Y | - | Y | Y | Y  | Y  | Y  | -  | -  | Y  | Y  | Y  | Y  | N  | Y  | 16       | 94  |
| Jovanovic et al., 2020 [87]        | N | Y | N | Y | Y | Y | - | Y | Y | N  | N  | Y  | -  | -  | N  | Y  | Y  | N  | Y  | N  | 9        | 53  |
| Jung and Park, 2018 [63]           | Y | Y | N | Y | Y | Y | - | Y | Y | Y  | Y  | Y  | -  | -  | N  | Y  | Y  | Y  | Y  | Y  | 15       | 88  |
| Jung and Park, 2020 [62]           | Y | Y | N | Y | Y | Y | - | Y | Y | Y  | Y  | Y  | -  | -  | N  | Y  | Y  | Y  | Y  | Y  | 14       | 82  |
| Jung and Park, 2022 [46]           | Y | Y | Y | Y | Y | Y | - | Y | Y | Y  | Y  | Y  | -  | -  | N  | Y  | Y  | Y  | N  | Y  | 16       | 94  |

|                                        |   |   |   |   |   |   |   |   |   |   |   |   |   |   |   |   |   |   |   |   |    |     |
|----------------------------------------|---|---|---|---|---|---|---|---|---|---|---|---|---|---|---|---|---|---|---|---|----|-----|
| Kim et al., 2011 [47]                  | Y | Y | Y | Y | Y | Y | - | Y | Y | Y | Y | Y | - | - | N | Y | Y | Y | N | Y | 16 | 94  |
| Kim and Kim., 2014 [64]                | Y | Y | N | Y | Y | Y | - | - | Y | Y | Y | Y | - | - | N | Y | Y | Y | Y | Y | 14 | 82  |
| Kuragano and Yokokura, 2020 [88]       | Y | Y | N | Y | Y | Y | - | Y | Y | N | N | N | - | - | N | N | Y | N | Y | N | 8  | 47  |
| Lee et al., 2008 [81]                  | N | Y | N | N | N | N | - | Y | N | N | N | Y | - | - | N | N | Y | N | Y | N | 5  | 29  |
| Lin et al., 2023 [25]                  | Y | Y | Y | Y | Y | Y | - | Y | Y | Y | Y | Y | - | - | N | Y | Y | N | N | Y | 15 | 88  |
| Liu et al., 2021 [2]                   | Y | Y | N | Y | Y | Y | - | Y | Y | Y | Y | Y | - | - | N | Y | Y | Y | N | Y | 15 | 88  |
| Margaritopoulos et al., 2015 [54]      | Y | Y | N | Y | Y | Y | - | Y | Y | Y | Y | Y | - | - | Y | Y | N | N | Y | Y | 14 | 82  |
| Moreira et al., 2015 [31]              | Y | Y | Y | Y | Y | Y | - | Y | Y | Y | Y | Y | - | - | Y | Y | Y | N | N | Y | 16 | 94  |
| Moreira et al., 2016 [12]              | Y | Y | Y | Y | Y | Y | - | Y | Y | Y | Y | Y | - | - | N | Y | Y | Y | N | N | 16 | 94  |
| Moreira et al., 2018 [42]              | Y | Y | Y | Y | Y | Y | - | Y | Y | Y | Y | Y | - | - | N | Y | Y | Y | N | Y | 17 | 100 |
| Moreira et al., 2021 [21]              | Y | Y | Y | Y | Y | Y | - | Y | Y | Y | Y | Y | - | - | N | Y | Y | Y | N | Y | 16 | 94  |
| Nadzalan et al., 2021 [98]             | Y | Y | N | Y | Y | Y | - | Y | Y | Y | Y | Y | - | - | N | Y | Y | N | N | Y | 14 | 82  |
| Nadzalan et al., 2022 [89]             | Y | Y | N | Y | Y | Y | - | Y | Y | Y | Y | Y | - | - | N | Y | Y | N | N | Y | 14 | 82  |
| Ng and Jumadi, 2022 [108]              | Y | Y | N | Y | Y | Y | - | Y | N | N | N | Y | - | - | N | Y | Y | Y | N | Y | 12 | 71  |
| Olsen and Hopkins, 2003 [30]           | Y | Y | N | Y | N | Y |   | Y | Y | Y | N | Y |   |   | N | Y | Y | N | N | Y | 12 | 71  |
| Ortenburger et al., 2016 [90]          | Y | Y | N | Y | Y | Y | - | Y | Y | Y | Y | Y | - | - | N | Y | Y | N | N | Y | 14 | 82  |
| Osman et al., 2022 [99]                | Y | Y | N | Y | Y | Y | - | Y | Y | N | N | Y | - | - | N | Y | Y | N | N | Y | 10 | 59  |
| O'Sullivan et al., 2008 [67]           | Y | Y | N | Y | Y | Y | - | Y | Y | Y | N | Y | - | - | N | Y | Y | N | Y | Y | 12 | 71  |
| O'Sullivan et al., 2009 [66]           | Y | Y | N | Y | Y | Y | - | Y | Y | Y | N | Y | - | - | N | Y | Y | N | N | N | 12 | 71  |
| O'Sullivan and Fife, 2015 [65]         | Y | Y | N | Y | Y | Y | - | Y | Y | N | Y | Y | - | - | N | Y | Y | Y | N | Y | 14 | 82  |
| Pedzich et al., 2006 [112]             | Y | Y | N | Y | Y | Y | - | Y | Y | Y | Y | Y | - | - | N | Y | Y | N | Y | N | 12 | 71  |
| Pieter and Pieter, 1995 [72]           | Y | Y | N | Y | Y | Y | - | Y | N | Y | Y | Y | - | - | N | Y | Y | N | Y | N | 11 | 65  |
| Pozo et al., 2011 [109]                | Y | Y | N | Y | Y | Y | - | Y | Y | Y | Y | Y | - | - | N | Y | Y | Y | N | Y | 15 | 88  |
| Preuschl et al., 2016 [100]            | Y | Y | N | Y | Y | Y | - | Y | Y | Y | Y | Y | - | - | N | Y | Y | Y | N | Y | 15 | 88  |
| Ramakrishnan et al., 2017 [110]        | Y | Y | N | Y | Y | Y | - | Y | N | Y | Y | Y | - | - | N | Y | Y | N | N | Y | 13 | 76  |
| Rexhepi et al., 2018 [80]              | Y | Y | N | Y | Y | Y | - | Y | Y | N | N | Y | - | - | N | Y | Y | N | Y | N | 11 | 65  |
| Serina and Lieu, 1991 [71]             | Y | Y | N | Y | Y | Y | - | Y | Y | N | Y | Y | - | - | N | Y | Y | N | N | N | 12 | 71  |
| Sorensen et al., 1996 [91]             | Y | Y | N | Y | Y | Y | - | Y | Y | N | Y | Y | - | - | N | Y | Y | Y | N | Y | 14 | 82  |
| Straiotto et al., 2021 [68]            | Y | Y | N | Y | Y | Y | - | Y | Y | Y | Y | Y | - | - | N | Y | Y | N | N | Y | 15 | 88  |
| Thibordee and Prasartwuth, 2014 [22]   | Y | Y | N | Y | Y | Y | - | Y | Y | Y | Y | Y | - | - | N | Y | Y | N | N | Y | 14 | 82  |
| Thibordee and Prasartwuth, 2014a [106] | Y | Y | N | Y | Y | Y | - | Y | Y | Y | Y | Y | - | - | N | Y | Y | Y | N | Y | 15 | 88  |
| Vagner et al., 2018 [111]              | Y | Y | N | Y | Y | Y | - | Y | Y | Y | Y | Y | - | - | N | Y | Y | Y | N | Y | 15 | 88  |
| Vagner et al., 2019 [11]               | Y | Y | N | Y | Y | Y | - | Y | Y | Y | Y | Y | - | - | Y | Y | Y | Y | N | Y | 16 | 94  |
| Vagner et al., 2022 [55]               | Y | Y | N | Y | Y | Y | - | - | Y | Y | Y | Y | - | - | Y | Y | Y | Y | N | Y | 16 | 94  |
| Vencesbrito et al., 2014 [92]          | Y | Y | N | Y | Y | Y | - | Y | Y | Y | Y | Y | - | - | N | Y | Y | N | N | Y | 13 | 76  |
| Wasik, 2010 [77]                       | Y | Y | N | Y | Y | Y | - | Y | Y | N | Y | Y | - | - | N | Y | Y | N | N | N | 12 | 71  |
| Wasik, 2011 [13]                       | Y | Y | N | Y | Y | Y | - | Y | Y | Y | Y | Y | - | - | N | Y | Y | N | N | N | 13 | 76  |

|                            |   |   |   |   |   |   |   |   |   |   |   |   |   |   |   |   |   |   |   |   |    |    |
|----------------------------|---|---|---|---|---|---|---|---|---|---|---|---|---|---|---|---|---|---|---|---|----|----|
| Wasik, 2011a [82]          | Y | Y | N | Y | Y | Y | - | Y | Y | Y | Y | Y | - | - | N | Y | Y | N | N | N | 13 | 76 |
| Wasik and Shan, 2015 [69]  | Y | Y | N | Y | Y | Y | - | Y | Y | Y | Y | Y | - | - | N | Y | Y | N | N | Y | 14 | 82 |
| Wasik and Shan, 2015a [70] | Y | Y | N | Y | Y | Y | - | Y | Y | Y | Y | Y | - | - | N | Y | Y | N | N | Y | 14 | 82 |
| Wasik and Gora, 2016 [96]  | Y | Y | N | Y | Y | Y | - | Y | Y | Y | N | Y | - | - | N | Y | Y | N | N | Y | 13 | 76 |
| Wasik and Gora, 2016a [93] | Y | Y | N | Y | Y | Y | - | Y | Y | Y | Y | Y | - | - | N | Y | Y | N | N | Y | 14 | 82 |
| Wasik et al., 2018 [95]    | Y | Y | N | Y | Y | Y | - | Y | Y | Y | Y | Y | - | - | N | Y | Y | N | Y | Y | 13 | 76 |
| Wasik et al., 2019 [94]    | Y | Y | N | Y | Y | Y | - | Y | Y | Y | Y | Y | - | - | N | Y | Y | N | N | Y | 14 | 82 |
| Wasik et al., 2021 [79]    | Y | Y | N | Y | Y | Y | - | Y | Y | Y | Y | Y | - | - | N | Y | Y | N | Y | Y | 13 | 76 |
| Wasik et al., 2021a [78]   | Y | Y | N | Y | Y | Y | - | Y | Y | Y | Y | Y | - | - | N | Y | Y | N | N | Y | 14 | 82 |
| Wasik et al., 2022 [73]    | Y | Y | N | Y | Y | Y | - | Y | Y | Y | Y | Y | - | - | N | Y | Y | Y | N | Y | 15 | 88 |
| Wasik et al., 2023 [74]    | Y | Y | N | Y | Y | Y | - | Y | Y | Y | Y | Y | - | - | N | Y | Y | N | N | Y | 14 | 82 |
| Wasik et al., 2023a [107]  | Y | Y | N | Y | Y | Y | - | Y | Y | Y | Y | Y | - | - | N | Y | N | Y | Y | Y | 13 | 76 |
| Wilk et al., 1983 [57]     | N | Y | N | N | N | N | - | Y | N | N | N | Y | - | - | N | Y | Y | N | N | N | 6  | 35 |
| Woo et al., 2013 [101]     | Y | Y | N | Y | Y | Y | - | Y | Y | Y | Y | Y | - | - | N | Y | Y | Y | N | Y | 15 | 88 |
| Yu et al., 2012 [102]      | Y | Y | N | Y | Y | Y | - | Y | Y | Y | Y | Y | - | - | N | Y | Y | N | N | N | 13 | 76 |

Key: “Y” = Yes, “N” = No, “-“ = Item not scored

**Table S3.** Summary of studies that reported kicking strike velocity

| <i>Author, year of publication</i> | <i>Participants (n) (nMale, nFemale)<br/>Age (years)<br/>Experience (years)<br/>Combat sport discipline</i>       | <i>Measurement method</i>                                                                                                              | <i>Strike measured</i>                     | <i>Reported value<br/>(Mean <math>\pm</math> SD)</i>                 |
|------------------------------------|-------------------------------------------------------------------------------------------------------------------|----------------------------------------------------------------------------------------------------------------------------------------|--------------------------------------------|----------------------------------------------------------------------|
| Aandahl et al., 2018 [28]          | 16 (11m, 5f)<br>20.6 $\pm$ 5.5<br>3.8 $\pm$ 2.5<br>TKD, KB                                                        | Motion capture system with 6 cameras sampling at 500hz<br>Marker: Fifth metatarsus                                                     | Roundhouse kick                            | Vmean: 17.9 $\pm$ 2.3                                                |
| Aragones et al., 2017 [83]         | 15 (10m, 5f)<br>41.2 $\pm$ 12.55<br>18.60 $\pm$ 7.57<br>KA                                                        | Motion capture system with 10 high speed cameras sampling at 333hz<br>Marker: Medial and lateral malleolus, first and fifth metatarsus | Front kick                                 | Vmean: 9.20 $\pm$ 1.7                                                |
| Branco et al., 2019 [58]           | 33 (33m)<br>Veteran: 54.2 $\pm$ 3.9, young: 23 $\pm$ 5.8<br>Veteran: 32.8 $\pm$ 10.0, young: 14.0 $\pm$ 4.6<br>KA | Motion capture system with 1 high speed cameras sampling at 210hz<br>Marker: Forefoot                                                  | Front kick                                 | Vmean: 9.1 $\pm$ 1.7                                                 |
| Chang et al., 2021 [59]            | 12 (6m, 6f)<br>20.33 $\pm$ 1.27<br>11.25 $\pm$ 2.83<br>TKD                                                        | Motion capture system with 6 high speed cameras sampling at 100hz<br>Marker: Fifth metatarsal                                          | Roundhouse kick<br>Roundhouse kick to head | Vmean: 10.0 $\pm$ 1.7<br>Vmean: 9.6 $\pm$ 1.7                        |
| Cheng et al., 2015 [97]            | 10 (10m)<br>22.00 $\pm$ 2.72<br>$\geq 4$<br>TKD                                                                   | Motion capture system with 3 high speed cameras sampling at 200hz<br>Marker: Lateral malleolus                                         | Back kick                                  | Vmean: 10.0 $\pm$ 1.0                                                |
| Daniel and Razvan-Liviu, 2014 [60] | 10 (10m)<br>21-24<br>NR<br>KA                                                                                     | Motion capture system<br>Marker: NR                                                                                                    | Roundhouse kick                            | Vmean: 12.3 $\pm$ 0.3                                                |
| Di Bacco et al., 2021 [84]         | 16 (16f)<br>23 $\pm$ 3.7<br>0 (Untrained)<br>Krav Maga                                                            | Motion capture system with 7 high speed cameras sampling at 100hz<br>Marker: Ankle                                                     | Front kick                                 | Vmean: 5.3 $\pm$ 0.2                                                 |
| Diniz et al., 2021 [26]            | 47 (47m)<br>25.5 $\pm$ 4.7<br>NR ("Black belt" or equivalent)<br>TKD, MT, KA                                      | Motion capture system with 6 infra-red cameras sampling at 200hz<br>Marker: Fifth metatarsus                                           | Roundhouse kick<br>KA<br>TKD<br>MT         | Vmean: 9.2 $\pm$ 1.2<br>Vmean: 8.0 $\pm$ 1.2<br>Vmean: 6.9 $\pm$ 1.4 |
| Estevan et al., 2013 [50]          | 9 (5m, 4f)<br>26.62 $\pm$ 4.6<br>14.16 $\pm$ 5.60<br>TKD                                                          | Motion capture system with 8 cameras sampling at 247hz<br>Marker: Posterior calcaneus                                                  | Roundhouse kick                            | Vmean: 14.4 $\pm$ 2.7                                                |

|                                     |                                                                                                          |                                                                                                                         |                                                  |                                                                        |
|-------------------------------------|----------------------------------------------------------------------------------------------------------|-------------------------------------------------------------------------------------------------------------------------|--------------------------------------------------|------------------------------------------------------------------------|
| Estevan et al., 2015<br>[43]        | 10 (5m, 5f)<br>m: $28.6 \pm 2.7$ , f: $22.2 \pm 5.5$<br>$12.9 \pm 5.3$<br>TKD                            | Motion capture system with 8 cameras<br>sampling at 240hz<br>Marker: Posterior calcaneus                                | Roundhouse kick                                  | Vmean: $11.9 \pm 1.4$                                                  |
| Fife et al., 2013<br>[75]           | 4 (2m, 2f)<br>m: $22.0 \pm 0.0$ , f: $20.0 \pm 2.8$<br>NR (“expert”)<br>TKD                              | Motion capture system with 8 infrared<br>cameras sampling at 500hz<br>Marker: Lateral malleolus and fifth<br>metatarsus | Roundhouse kick to head<br>Axe kick<br>Back kick | Vmean: $16.9 \pm 4.7$<br>Vmean: $8.5 \pm 1.9$<br>Vmean: $9.9 \pm 1.5$  |
| Fife et al., 2013a<br>[76]          | 12 (12m)<br>$22.5 \pm 3.5$<br>NR (“A class international”)<br>TKD                                        | Motion capture system with 8 infrared<br>cameras sampling at 500hz<br>Marker: Foot                                      | Roundhouse kick to head<br>Axe kick<br>Back kick | Vmean: $11.9 \pm 1.8$<br>Vmean: $8.9 \pm 1.7$<br>Vmean: $10.6 \pm 1.4$ |
| Gavagan and<br>Sayers, 2017<br>[24] | 24 (m/f NR)<br>TKD: $28.6 \pm 9.5$ , MT: $22.3 \pm 4.1$ , KA: $30.3 \pm 10.7$<br>$\geq 5$<br>TKD, MT, KA | Motion capture system with 7 infrared<br>cameras sampling at 500hz<br>Marker: Lateral malleolus and fifth<br>metatarsus | Roundhouse kick to head                          | Vmean: $14.7 \pm 1.2$                                                  |
| Goethel et al., 2019<br>[45]        | 14 (14m)<br>Elite: $26.3 \pm 6.9$ , Sub-elite: $27.5 \pm 6.1$<br>NR (“National” to “state” level)<br>KA  | Motion capture system with 7 infrared<br>cameras sampling at 250hz<br>Marker: Lateral malleolus and fifth<br>metatarsus | Front kick                                       | Vmean: $9.5 \pm 0.8$                                                   |
| Goulart et al., 2016<br>[32]        | 31 (18m, 13f)<br>$20.17 \pm 1.89$<br>NR<br>TKD                                                           | Contact mat and contact sensor in TKD<br>Racket<br>Marker: NA                                                           | Roundhouse kick                                  | Vmean: $9.0 \pm 0.9$                                                   |
| Grymanowski et al.,<br>2019<br>[85] | 1 (1m)<br>32<br>NR (“Expert”)<br>MT                                                                      | Motion capture system with 6 cameras<br>Marker: Lateral malleolus and fifth<br>metatarsus                               | Front kick                                       | Vmax: 8.3*                                                             |
| Guo, 2013<br>[23]                   | 8 (8m)<br>$22.6 \pm 2.9$<br>NR (“Domestic master” and “first grade”)<br>TKD                              | Motion capture system with 2 cameras<br>sampling at 120hz<br>Marker: NR                                                 | Back kick                                        | Vmean: $8.9 \pm 0.3$                                                   |
| Huang et al., 2022<br>[61]          | 18 (m/f NR)<br>$19.89 \pm 1.02$<br>$10.28 \pm 1.74$<br>TKD                                               | Motion capture system with 8 infrared<br>cameras sampling at 200hz<br>Marker: Lateral malleolus and fifth<br>metatarsus | Roundhouse kick                                  | Vmean: $12.7 \pm 1.7$                                                  |
| Ibrahim et al., 2022<br>[86]        | 25 (25m)<br>$22.57 \pm 1.36$<br>NR (“National level”)<br>TKD                                             | Multiple high-speed cameras<br>Marker: Lateral malleolus and<br>calcaneus                                               | Front kick                                       | Vmean: $5.2 \pm 1.0$                                                   |

|                                  |                                                             |                                                                                                                                |                                                                     |                                                                                                 |
|----------------------------------|-------------------------------------------------------------|--------------------------------------------------------------------------------------------------------------------------------|---------------------------------------------------------------------|-------------------------------------------------------------------------------------------------|
| Jakubiak and Saunders, 2008 [29] | 12 (12m)<br>NR<br>NR (“Experienced”)<br>TKD                 | Floor mounted pressure sensor and sensor house in TKD racket<br>Marker: NA                                                     | Roundhouse kick                                                     | Vmean: $11.8 \pm 0.7^*$                                                                         |
| Jandacka et al., 2013 [53]       | 10 (5m, 5f)<br>$25.4 \pm 5.0$<br>$13.8 \pm 5.8$<br>TKD      | Motion capture system with 8 cameras sampling at 247hz<br>Marker: Posterior calcaneus                                          | Roundhouse kick                                                     | Vmean: $12.0 \pm 1.2$                                                                           |
| Jovanovic et al., 2020 [87]      | 16 (16m)<br>18-22<br>NR<br>KA                               | Camera based motion capture system<br>Marker: NR                                                                               | Front kick                                                          | Vmean: $16.7 \pm 1.3$                                                                           |
| Jung and Park, 2018 [63]         | 10 (10m)<br>$21.7 \pm 0.5$<br>$8.9 \pm 1.1$<br>TKD          | Motion capture system with 7 high speed cameras sampling at 250hz<br>Marker: Lateral malleolus, fifth metatarsus and calcaneus | Roundhouse kick                                                     | Vmean: $12.8 \pm 1.1$                                                                           |
| Jung and Park, 2020 [62]         | 10 (10m)<br>$21.7 \pm 0.5$<br>$8.9 \pm 1.1$<br>TKD          | Motion capture system with 7 high speed cameras sampling at 250hz<br>Marker: Lateral malleolus, fifth metatarsus and calcaneus | Roundhouse kick                                                     | Vmean: $16.8 \pm 1.3$                                                                           |
| Jung and Park, 2022 [46]         | 10 (10m)<br>$21.7 \pm 0.5$<br>$8.9 \pm 1.1$<br>TKD          | Motion capture system with 7 infrared cameras sampling at 250hz<br>Marker: Lateral malleolus, fifth metatarsus and calcaneus   | Roundhouse kick                                                     | Vmean: $15.6 \pm 2.2$                                                                           |
| Kim and Kim, 2014 [64]           | 12 (12m)<br>$20.4 \pm 8.4$<br>$10.6 \pm 3.2$<br>TKD         | Motion capture system with 6 cameras sampling at 200hz<br>Marker: Lateral malleoli                                             | Roundhouse kick<br>Back kick                                        | Vmean: $15.9 \pm 1.7$<br>Vmean: $12.2 \pm 0.8$                                                  |
| Kim et al., 2011 [47]            | 12 (12m)<br>$20.4 \pm 8.4$<br>$10.6 \pm 3.2$<br>TKD         | Motion capture system with 6 cameras sampling at 200hz<br>Marker: Lateral malleoli                                             | Roundhouse kick<br>Back kick<br>Thrashing kick<br>Turning back kick | Vmean: $14.7 \pm 1.3$<br>Vmean: $11.5 \pm 1.0$<br>Vmean: $9.9 \pm 1.3$<br>Vmean: $11.4 \pm 1.2$ |
| Kuragano and Yokokura, 2012 [88] | 1 (1m)<br>26<br>NR (“2nd degree black belt”)<br>Nihon-Kempo | High speed video system, 125 frames per second<br>Marker: Toes                                                                 | Front kick                                                          | Vmax: $9.2^*$                                                                                   |
| Lee et al., 2008 [81]            | 1 (1m)<br>NR<br>NR (“High-level male”)<br>TKD               | A tripod mounted camera<br>Marker: Foot                                                                                        | Side kick                                                           | Vmax: 12.7                                                                                      |

|                                     |                                                                                                             |                                                                                                                                                |                 |                    |
|-------------------------------------|-------------------------------------------------------------------------------------------------------------|------------------------------------------------------------------------------------------------------------------------------------------------|-----------------|--------------------|
| Lin et al., 2023<br>[25]            | 20 (20m)<br>19.90 ± 0.97<br>10.25 ± 1.77<br>TKD                                                             | Motion capture system with 8 cameras<br>sampling at 200hz<br>Marker: Medial ankle, heel, toes                                                  | Side kick       | Vmean: 6.3 ± 0.2   |
| Liu et al., 2021<br>[2]             | 19 (19m)<br>19.90 ± 0.98<br>10.36 ± 1.73<br>TKD                                                             | Motion capture system with 8 cameras<br>sampling at 200hz<br>Marker: Lateral malleolus                                                         | Roundhouse kick | Vmean: 11.6 ± 1.6  |
| Moreira et al., 2015<br>[31]        | 6 (6m)<br>20.5 ± 4.3<br>≥6<br>TKD                                                                           | Motion capture system with 9 cameras<br>sampling at 200 hz<br>Marker: Foot                                                                     | Roundhouse kick | Vmean: 16.1 ± 1.7  |
| Moreira et al., 2016<br>[12]        | 14 (10m, 4f)<br>Elite: 23.6 ± 2.1, Sub-elite: 22.4 ± 1.3<br>Elite: 12.2 ± 8.5, Sub-elite: 10.4 ± 6.1<br>TKD | Motion capture system with 7 cameras<br>sampling at 250 hz<br>Marker: Posterior calcaneus, lateral<br>malleolus and 2 <sup>nd</sup> metatarsus | Roundhouse kick | Vmean: 16.8 ± 0.5* |
| Moreira et al., 2018<br>[42]        | 14 (10m, 4f)<br>Elite: 23.6 ± 2.1, Sub-elite: 22.4 ± 1.3<br>Elite: 12.2 ± 8.5, Sub-elite: 10.4 ± 6.1<br>TKD | Motion capture system with 7 cameras<br>sampling at 250hz<br>Marker: Posterior calcaneus, lateral<br>malleolus and 2 <sup>nd</sup> metatarsus  | Roundhouse kick | Vmean: 16.3 ± 1.6  |
| Moreira et al., 2021<br>[21]        | 14 (10m, 4f)<br>Elite: 23.6 ± 2.1, Sub-elite: 22.4 ± 1.3<br>Elite: 7.92, Sub-elite: 8.5<br>TKD              | Motion capture system with 7 cameras<br>sampling at 250 hz<br>Marker: Posterior calcaneus, lateral<br>malleolus and 2 <sup>nd</sup> metatarsus | Roundhouse kick | Vmean: 17.4 ± 0.7  |
| Nadzalan et al.,<br>2021<br>[98]    | 24 (m/f NR)<br>22.19 ± 1.34<br>NR (“State or university level”)<br>TKD                                      | Motion capture system with 6 infrared<br>cameras sampling at 100hz<br>Markers: second metatarsal, lateral<br>malleolus, calcaneus              | Axe kick        | Vmean: 8.7 ± 0.9   |
| Nadzalan et al.,<br>2022<br>[89]    | 24 (m/f NR)<br>22.19 ± 1.34<br>NR (“State or university level”)<br>Taekwondo                                | Motion capture system with 6 infrared<br>cameras sampling at 100hz<br>Markers: second metatarsal, lateral<br>malleolus, calcaneus              | Front kick      | Vmean: 7.4 ± 0.2   |
| Ortenburger et al.,<br>2016<br>[90] | 6 (6f)<br>19.8 ± 3.8<br>NR<br>TKD                                                                           | Motion capture system with 10 near-<br>infrared cameras sampling at 370hz<br>Marker: NR                                                        | Front kick      | Vmean: 9.0 ± 1.5   |
| Osman et al., 2022<br>[99]          | 30 (m/f NR)<br>22.21 (mean)<br>≥3<br>TKD                                                                    | Motion capture system with 6 infrared<br>cameras sampling at 100hz<br>Markers: second metatarsal, lateral<br>malleolus, calcaneus              | Axe kick        | Vmean: 6.7 ± 0.8   |



|                                |                                                                                                            |                                                                                                                                   |                                            |                                                            |
|--------------------------------|------------------------------------------------------------------------------------------------------------|-----------------------------------------------------------------------------------------------------------------------------------|--------------------------------------------|------------------------------------------------------------|
| O'Sullivan and Fife, 2015 [65] | 6 (3m, 3f)<br>22 ± 5<br>≥10<br>TKD (Paralympic)                                                            | Motion capture system with 7 infrared cameras sampling at 150hz<br>Marker: NR                                                     | Back kick<br>Side kick<br>Roundhouse kick  | Vmean: 10.7 ± 0.5<br>Vmean: 8.0 ± 1.1<br>Vmean: 13.8 ± 1.5 |
| O'Sullivan et al., 2008 [67]   | 5 (m/f NR)<br>NR<br>≥10<br>TKD                                                                             | Motion capture system with 7 cameras sampling at 150 hz<br>Marker: NR                                                             | Roundhouse kick<br>Roundhouse kick to head | Vmean: 17.7 ± 1.7<br>Vmean: 16.5 ± 0.6                     |
| O'Sullivan et al., 2009 [66]   | 10 (m/f NR)<br>NR<br>≥10<br>Yongmundo and TKD                                                              | Motion capture system with 7 cameras sampling at 150 hz<br>Marker: NR                                                             | Roundhouse kick<br>Roundhouse to head      | Vmean: 18.3 ± 1.1<br>Vmean: 17.2 ± 0.5                     |
| Pieter and Pieter, 1995 [72]   | 26 (11m, 15f)<br>m: 21.8±3.7, 23.3±5.0, f: 25.6±5.2, 26.5±5.5<br>NR ("Olympic team")<br>TKD                | Electronic dual beam timing system<br>1cm from impact surface<br>Marker: NA                                                       | Side kick<br>Roundhouse kick<br>Back kick  | Vmean: 6.9 ± 0.4<br>Vmean: 16.3 ± 1.3<br>Vmean: 9.1 ± 1.5  |
| Preuschl et al., 2016 [100]    | 22 (22m)<br>23 ± 5.3<br>≥4<br>TKD                                                                          | Motion capture system with 8 infrared cameras sampling at 250hz<br>Markers: second metatarsal, lateral malleolus, calcaneus       | Axe kick                                   | Vmean: 7.8 ± 0.9                                           |
| Rexhepi et al., 2018 [80]      | 7 (7m)<br>NR<br>NR ("Karate master")<br>KA                                                                 | Motion capture system with 3 cameras sampling at 60hz<br>Marker: NR                                                               | Roundhouse kick to head                    | Vmean: 14.0 ± 2.3                                          |
| Serina and Lieu, 1991 [71]     | 3 (3m)<br>NR<br>NR ("Black belt (1 <sup>st</sup> Dan)")<br>TKD                                             | Motion capture system with 2 infrared cameras sampling at 500hz<br>Marker: base of the foot below the calcaneum, first metatarsal | Roundhouse kick<br>Side kick<br>Back Kick  | Vmax: 15.6*<br>Vmax: 8.3*<br>Vmax: 9.4*                    |
| Sorensen et al., 1996 [91]     | 17 (13m, 4f)<br>18-34<br>≥3<br>TKD                                                                         | Motion capture system with 1 camera sampling at 200hz<br>Marker: lateral malleolus, fifth metatarsal joint                        | Front kick                                 | Vmax: 11.7*                                                |
| Straiotto et al., 2021 [68]    | 18 (17m, 1f)<br>Elite: 27.0 ± 0.4, non-elite: 35.0 ± 0.1<br>Elite: 18.8 ± 1.5, non-elite: 8.3 ± 1.0<br>TKD | Motion capture system with 8 camera sampling at 500hz<br>Marker: fifth metatarsus and calcaneus                                   | Roundhouse kick                            | Vmax: 13.6 ± 0.6                                           |

|                                      |                                                                                                           |                                                                                                                      |                         |                                 |
|--------------------------------------|-----------------------------------------------------------------------------------------------------------|----------------------------------------------------------------------------------------------------------------------|-------------------------|---------------------------------|
| Vagner et al., 2019<br>[11]          | 25 (25m)<br>27.7 ± 7.2<br>≥2<br>Military combat                                                           | Motion capture system with 6 camera<br>sampling at 500hz<br>Marker: lateral malleolus                                | Front kick              | Vmean: 7.7 ± 1.03               |
| Vagner et al., 2022<br>[55]          | 24 (24m)<br>26.8 ± 10.1<br>NR<br>Military combat                                                          | Motion capture system with 6 camera<br>sampling at 200hz<br>Marker: lateral malleolus                                | Front kick              | Vmean: 8.2 ± 0.92               |
| Vences Brito et al.,<br>2014<br>[92] | 30 (30m)<br>KA: 24 ± 7, untrained: 23 ± 6<br>KA: 13 (mean), untrained: 0<br>KA and untrained participants | Motion capture system with 1 camera<br>sampling at 210hz<br>Marker: Markers: second metatarsal,<br>lateral malleolus | Front kick              | Vmean: 8.1 ± 0.9                |
| Wasik, 2010<br>[77]                  | 1 (NR)<br>17<br>NR (“International Sports Master”)<br>TKD                                                 | Motion capture system with 6 infrared<br>cameras sampling at 120hz<br>Marker: NR                                     | Roundhouse kick to head | Vmax: 10.4                      |
| Wasik, 2011<br>[13]                  | 6 (5m, 1f)<br>16.5 ± 0.7<br>≥4<br>TKD                                                                     | Motion capture system with 6 infrared<br>cameras sampling at 120hz<br>Marker: NR                                     | Side kick               | Vmean: 5.7 ± 1.2                |
| Wasik, 2011a<br>[82]                 | 1 (1m)<br>17<br>NR (“1 <sup>st</sup> Dan”)<br>TKD                                                         | Motion capture system with 6 infrared<br>cameras sampling at 120hz<br>Marker: NR                                     | Side kick               | Vmean: 5.6 ± 0.4                |
| Wasik and Shan,<br>2015<br>[69]      | 6 (5m, 1f)<br>16.5 ± 0.7<br>≥4<br>TKD                                                                     | Motion capture system with 6 infrared<br>cameras sampling at 120hz<br>Marker: NR                                     | Roundhouse kick         | Vmean: 9.8 ± 2.5<br>Vmax: 14.6  |
| Wasik and Shan,<br>2015a<br>[70]     | 6 (5m, 1f)<br>16.5 ± 5<br>≥4<br>TKD                                                                       | Motion capture system with 6 infrared<br>cameras sampling at 120hz<br>Marker: NR                                     | Roundhouse kick         | Vmean: 14.6 ± 0.7               |
| Wasik and Gora,<br>2016<br>[96]      | 3 (m/f NR)<br>16.3 ± 0.6<br>2-6<br>TKD                                                                    | Motion capture system with 6 infrared<br>cameras sampling at 120hz<br>Marker: NR                                     | Back kick               | Vmean: 6.00 ± 1.4<br>Vmax: 7.34 |
| Wasik and Gora,<br>2016a<br>[93]     | 1 (1m)<br>28<br>NR (“2 <sup>nd</sup> Dan Black Belt”)<br>TKD                                              | Motion capture system with 10 camera<br>sampling at 370hz<br>Marker: NR                                              | Front kick              | Vmean: 13.9 ± 0.9               |

|                             |                                                                                                                            |                                                                                                              |                                                         |                                                                                                  |
|-----------------------------|----------------------------------------------------------------------------------------------------------------------------|--------------------------------------------------------------------------------------------------------------|---------------------------------------------------------|--------------------------------------------------------------------------------------------------|
| Wasik et al., 2018<br>[95]  | 14 (8m, 6f)<br>m: $18.3 \pm 1.7$ , f: $19.8 \pm 3.8$<br>$\geq 4$<br>TKD                                                    | Motion capture system with 10 camera<br>sampling at 250hz<br>Marker: metatarso- phalangeal joint             | Front kick                                              | Vmean: $11.0 \pm 1.2$                                                                            |
| Wasik et al., 2019<br>[94]  | 14 (8m, 6f)<br>m: $18.3 \pm 1.7$ , f: $19.8 \pm 3.8$ y<br>$\geq 4$<br>TKD                                                  | Motion capture system with 10 near-<br>infrared camera sampling at 370hz<br>Marker: NR                       | Front kick                                              | Vmean: $10.8 \pm 1.3$                                                                            |
| Wasik et al., 2021<br>[79]  | 15 (15m)<br>$22.5 \pm 6.2$<br>10.67<br>TKD                                                                                 | Motion capture system with 10 near-<br>infrared camera sampling at 370hz<br>Marker: lateral side of the foot | Roundhouse kick to head                                 | Vmax: 14.6                                                                                       |
| Wasik et al., 2021a<br>[78] | 15 (15m)<br>$22.5 \pm 6.2$<br>$\geq 4$<br>TKD                                                                              | Motion capture system with 10 near-<br>infrared camera sampling at 370hz<br>Marker: dorsal part of the foot  | Roundhouse kick to head<br>Front kick                   | Vmean: $14.6 \pm 1.5^*$<br>Vmean: $10.4 \pm 1.2^*$                                               |
| Wasik et al., 2022<br>[73]  | 15 (15m)<br>$21.9 \pm 6.8$ y<br>$\geq 4$<br>TKD                                                                            | Motion capture system with 10 near-<br>infrared camera sampling at 370hz<br>Marker: Ankle                    | Roundhouse kick                                         | Vmean: $12.4 \pm 2.0$                                                                            |
| Wasik et al., 2023<br>[74]  | 13 (m/f NR)<br>$22.6 \pm 6.28$<br>$\geq 4$<br>TKD                                                                          | Motion capture system with 10 near-<br>infrared camera sampling at 370hz<br>Marker: Great toe                | Roundhouse kick                                         | Vmean: $13.2 \pm 2.3$<br>Vmax: 16.6                                                              |
| Wilk et al., 1983<br>[57]   | NR<br>NR<br>NR<br>KA                                                                                                       | Multiflash strobe lamp at 60 or 120<br>flashes per second<br>Marker: NR                                      | Roundhouse kick<br>Back kick<br>Front kick<br>Side kick | Vmean: $10.3 \pm 0.8$<br>Vmean: $11.3 \pm 0.7$<br>Vmean: $12.2 \pm 3.2$<br>Vmean: $12.2 \pm 3.2$ |
| Woo et al., 2013<br>[101]   | 15 (m/f NR)<br>NR<br>$\geq 10$<br>TKD                                                                                      | Motion capture system with 9 cameras<br>sampling at 150hz<br>Marker: fifth metatarsal                        | Front axe kick<br>In-out axe kick<br>Out-in axe kick    | Vmean: $7.9 \pm 1.1$<br>Vmean: $7.7 \pm 0.6$<br>Vmean: $7.4 \pm 0.7$<br>Vmax: 11.4               |
| Yu et al., 2012<br>[102]    | 12 (12m)<br>Professional: $23.4 \pm 1.2$ , advanced: $21.3 \pm 1.6$<br>Professional: $\geq 15$ , advanced: $\geq 5$<br>TKD | Motion capture system with 4 camera<br>sampling at 60hz<br>Marker: Ankle                                     | Axe kick                                                | Vmean: $10.9 \pm 1.2$                                                                            |

KEY: NR = not reported, TKD = Taekwondo, KA = Karate, KB = Kickboxing, MT = Muay Thai, Vmean = mean velocity reported, Vmax = maximum velocity reported, \* = Extracted from figure

**Table S4.** Summary of studies that reported kicking strike impact force

| <i>Author, year of publication</i> | <i>Participants (n) (nMale, nFemale)<br/>Age (years)<br/>Experience (years)<br/>Combat sport discipline</i>      | <i>Measurement method</i>                                                                                          | <i>Strike measured</i>                     | <i>Reported value<br/>(Mean <math>\pm</math> SD)</i>       |
|------------------------------------|------------------------------------------------------------------------------------------------------------------|--------------------------------------------------------------------------------------------------------------------|--------------------------------------------|------------------------------------------------------------|
| Busko and Nikolaidis., 2018 [103]  | 6 (6m)<br>17.7 $\pm$ 0.7<br>6.5 $\pm$ 1.6<br>TKD                                                                 | BTS-3 (Dynamometric punching bag with embedded strain gauge)                                                       | Roundhouse kick<br>Back kick               | Fmean: 4580.8 $\pm$ 1130.3<br>Fmean: 3568.0 $\pm$ 1306.0   |
| Busko et al., 2016 [104]           | 28 (14m, 14f)<br>m: 17.6 $\pm$ 2.7, f: 18.7 $\pm$ 3.1<br>m: 8.1 $\pm$ 2.8, f: 7.1 $\pm$ 4.5<br>$\geq$ 7.1<br>TKD | BTS-4AP-2K (Dynamometric punching bag embedded with 2 two tri-axial accelerometers)                                | Roundhouse kick<br>Back kick               | Fmean: 2072.3 $\pm$ 472.2<br>Fmean: 3514.6 $\pm$ 1190.4    |
| Di Bacco et al., 2021 [84]         | 16<br>23 $\pm$ 3.7<br>0 (Untrained)<br>Krav Maga                                                                 | Vertically mounted impact force plate with foam padding                                                            | Front kick                                 | Fmax: 2247*                                                |
| Dworak et al., 1998 [27]           | 26 (m/f NR)<br>KA: 29.4 $\pm$ 4.9, KB: 21.9 $\pm$ 2.1<br>KA: 12.6 $\pm$ 4.1, KB: 3.3 $\pm$ 2.1<br>KA and KB      | Three axis piezoelectric force platform covered with absorbing cushion                                             | Front kick<br>Side kick                    | Fmean: 68.8 $\pm$ 26.9 N/KG<br>Fmean: 91.2 $\pm$ 14.8 N/KG |
| Estevan and Falco, 2013 [44]       | 33 (33m)<br>24.3 $\pm$ 3.0<br>$\geq$ 4<br>TKD                                                                    | A force platform was placed with 9 piezoresistant sensors organised in a triangular structure on a striking dummy. | Roundhouse kick<br>Roundhouse kick to head | Fmean: 19.8 $\pm$ 6.6 N/KG<br>Fmean: 18.7 $\pm$ 3.5 N/KG   |
| Estevan et al., 2011 [51]          | 27 (27m)<br>26.56 $\pm$ 2.23<br>$\geq$ 4<br>TKD                                                                  | A force platform was placed with 5 piezoresistant sensors organised in a pentagonal structure on a striking dummy. | Roundhouse kick to head                    | Fmean: 1829 $\pm$ 161                                      |
| Estevan et al., 2012 [48]          | 36 (36m)<br>25.03 $\pm$ 5.68<br>$\geq$ 4<br>TKD                                                                  | A force platform was placed with 9 piezoresistant sensors organised in a triangular structure on a striking dummy. | Roundhouse kick to head                    | Fmean: 1464.4 $\pm$ 448.9                                  |
| Estevan et al., 2014 [56]          | 43 (33m, 10f)<br>24.4 $\pm$ 5.4<br>10.8 $\pm$ 6.88<br>TKD                                                        | A force platform was placed with 9 piezoresistant sensors organised in a triangular structure on a striking dummy. | Roundhouse kick                            | Fmean: 1277 $\pm$ 504.1                                    |

|                                      |                                                                                                                      |                                                                                                                    |                                            |                                                             |
|--------------------------------------|----------------------------------------------------------------------------------------------------------------------|--------------------------------------------------------------------------------------------------------------------|--------------------------------------------|-------------------------------------------------------------|
| Falco et al., 2009<br>[49]           | 31 (m/f NR)<br>21.57 ± 4.75<br>≥4<br>TKD                                                                             | A force platform was placed with 5 piezoresistant sensors organised in a pentagonal structure on a striking dummy. | Roundhouse kick                            | Fmean: 2089.8 ± 634.7                                       |
| Falco et al., 2013<br>[52]           | 49 (34m, 14f)<br>m expert: 23.5 ± 3.3, f expert: 23.9 ± 6.2, m novice: 25.2 ± 7.1, f novice: 25.0 ± 6.5<br>≥4<br>TKD | A force platform was placed with 5 piezoresistant sensors organised in a pentagonal structure on a striking dummy. | Roundhouse kick                            | Fmean: 19.3 ± 6.7 N/KG                                      |
| Gavagan and Sayers, 2017<br>[24]     | 24 (m/f NR)<br>TKD: 28.6 ± 9.5, MT: 22.3 ± 4.1, KA: 30.3 ± 10.7<br>≥5<br>TKD, MT, KA                                 | Kicking rig with embedded strain gauge, recording at 1000hz                                                        | Roundhouse kick to head<br>TKD<br>MT<br>KA | Fmean: 1547 ± 530<br>Fmean: 1400 ± 419<br>Fmean: 1211 ± 219 |
| Gorski et al., 2014<br>[113]         | 1 (1m)<br>25<br>NR (“2 <sup>nd</sup> degree black belt”)<br>TKD                                                      | BTS-4AP-2K (Dynamometric punching bag embedded with 2 two tri-axial accelerometers)                                | Axe kick                                   | Fmean: 122.6 ± 14.5                                         |
| Gorski and Orysiak, 2019<br>[105]    | 6 (m/f NR)<br>20.0 ± 3.2<br>NR (“Olympic taekwondo team”)<br>TKD                                                     | BTS-4AP-2K (Dynamometric punching bag embedded with 2 two tri-axial accelerometers)                                | Roundhouse kick<br>Side kick               | Fmean: 2733 ± 748<br>Fmean: 1779 ± 372                      |
| Kuragano and Yokokura, 2012<br>[88]  | 1 (1m)<br>26<br>NR (“2nd degree black belt”)<br>Nihon-Kempo                                                          | A piezoelectric three-component force sensor                                                                       | Front kick                                 | Fmax: 4500                                                  |
| Lee et al., 2008<br>[81]             | 1 (1m)<br>NR<br>NR (“High-level male”)<br>TKD                                                                        | Spring balance                                                                                                     | Side kick                                  | Fmax: 1280                                                  |
| Margaritopoulos et al., 2015<br>[54] | 10 (5m, 5f)<br>m: 18.4 ± 1.2, f: 19.2 ± 0.4<br>5 ± 0.5<br>KA                                                         | Vertically mounted force plate                                                                                     | Back kick                                  | Fmean: 562.4 ± 49.5                                         |
| Ng and Jumadi, 2022<br>[108]         | 4 (4m)<br>NR<br>NR<br>Silat                                                                                          | Force sensor attached to the surface of a kicking pad                                                              | Front kick                                 | Fmean: 466.6 ± 19.8                                         |
| Olsen and Hopkins, 2003<br>[30]      | 30 (18m, 4f, 8NR)<br>Experimental: m 26 ± 6, f 27 ± 4, Control: m 27 ± 11, f 27 ± 2<br>≥1<br>NR (“Martial arts”)     | Vertically mounted impact force plate                                                                              | Front kick<br>Side kick                    | Fmean: 20 ± 5 N/KG<br>Fmean: 20 ± 7 N/KG                    |

|                                        |                                                                                                                                             |                                                                                                                                                            |                                            |                                                                                |
|----------------------------------------|---------------------------------------------------------------------------------------------------------------------------------------------|------------------------------------------------------------------------------------------------------------------------------------------------------------|--------------------------------------------|--------------------------------------------------------------------------------|
| O'Sullivan et al., 2008 [67]           | 5 (m/f NR)<br>NR<br>$\geq 10$<br>TKD                                                                                                        | Sandbag embedded with two tri-axial accelerometers                                                                                                         | Roundhouse kick<br>Roundhouse kick to head | Fmean: $6400 \pm 898$<br>Fmean: $5419 \pm 659$                                 |
| O'Sullivan et al., 2009 [66]           | 10 (m/f NR)<br>NR<br>$\geq 10$<br>Yongmundo and TKD                                                                                         | Sandbag embedded with two tri-axial accelerometers                                                                                                         | Roundhouse kick<br>Roundhouse kick to head | Fmean: $6400 \pm 898$<br>Fmean: $5475 \pm 1293$                                |
| Pedzich et al., 2006 [112]             | 5 (m/f NR)<br>$25 \pm 3.74$<br>5-7<br>TKD                                                                                                   | Vertically mounted impact force plate with absorption layer                                                                                                | Side kick<br>Back kick                     | Fmean: $9015 \pm 2382$<br>Fmean: $8569 \pm 2381$                               |
| Pieter and Pieter, 1995 [72]           | 26 (11m, 15f)<br>m: $21.8 \pm 3.7$ , $23.3 \pm 5.0$ , f: $25.6 \pm 5.2$ , $26.5 \pm 5.5$<br>NR ("Olympic team")<br>TKD                      | Water filled heavy bag with built in force sensor                                                                                                          | Side kick<br>Roundhouse kick<br>Back kick  | Fmean: $461.8 \pm 100.7$<br>Fmean: $518.7 \pm 96.3$<br>Fmean: $661.9 \pm 52.7$ |
| Pozo et al., 2011 [109]                | 17 (m/f NR)<br>International: $24.2 \pm 10.6$ , National: $37.9 \pm 9.0$<br>International: $13.0 \pm 6.4$ , National: $18.7 \pm 12.1$<br>KA | Vertically mounted Strain gauge force plate                                                                                                                | Front kick                                 | Fmean: $57.7 \pm 30.3$ N/KG                                                    |
| Ramakrishnan et al., 2017 [110]        | 52 (42m, 10f)<br>Trained: $31.6 \pm 10.3$ , Untrained: $28.1 \pm 7.2$<br>NR<br>Various martial arts and untrained participants              | Vertically mounted force plate covered with high density foam                                                                                              | Front kick                                 | Fmean: 5200<br>Fmax: 7790                                                      |
| Thibordee and Prasartwuth, 2014 [22]   | 20 (20m)<br>NR<br>NR ("National level")<br>TKD                                                                                              | A square-shaped kicking target with polyurethane foam attached to a force transducer                                                                       | Roundhouse kick                            | Fmean: $172.0 \pm 19.4$                                                        |
| Thibordee and Prasartwuth, 2014a [106] | 16 (16m)<br>High impact: $24.3 \pm 5.9$ , Low impact: $16.8 \pm 7.7$<br>High impact: $11.0 \pm 7.6$ , Low impact: $6.5 \pm 3.0$<br>TKD      | A rectangular-shaped kicking target with spongy foam and polyvinyl chloride sheet cover was fixed to a wall and attached to a mono- axial force transducer | Roundhouse kick                            | Fmean: $1490.8 \pm 274.5$<br>Fmax: 1986                                        |
| Vagner et al., 2018 [111]              | 6 (6m)<br>$22.2 \pm 1.5$<br>NR<br>Military combat                                                                                           | Vertically mounted force plate covered with a kick pad                                                                                                     | Front kick                                 | Fmean: $3180 \pm 647$                                                          |
| Vagner et al., 2019 [11]               | 25 (25m)<br>$27.7 \pm 7.2$<br>$\geq 2$                                                                                                      | A vertically anchored force plate                                                                                                                          | Front kick                                 | Fmean: $2202 \pm 489$                                                          |

|                              |                                                                     |                                              |                                            |                                                                        |
|------------------------------|---------------------------------------------------------------------|----------------------------------------------|--------------------------------------------|------------------------------------------------------------------------|
| Vagner et al., 2022<br>[55]  | Military combat<br>24 (24m)<br>26.8 ± 10.1<br>NR<br>Military combat | Vertically mounted force plate               | Front kick                                 | Fmean: 3013 ± 824                                                      |
| Wasik, 2011<br>[13]          | 6 (5m, 1f)<br>16.5 ± 0.7<br>≥4<br>TKD                               | Calculation from motion capture              | Side kick                                  | Fmax: 1020                                                             |
| Wasik, 2011a<br>[82]         | 1 (1m)<br>17<br>NR (“1 <sup>st</sup> Dan”)<br>TKD                   | Calculation from motion capture              | Side kick                                  | Fmax: 1120                                                             |
| Wasik et al., 2023a<br>[107] | 1 (1m)<br>32<br>NR (“Master”)<br>TKD                                | Martial arts shield mounted on a force plate | Front kick<br>Side kick<br>Roundhouse kick | Fmean: 2008.6 ± 284.8<br>Fmean: 2406.9 ± 299.8<br>Fmean: 2330.7 ± 71.2 |

KEY: NR = not reported, TKD = Taekwondo, KA = Karate, KB = Kickboxing, MT = Muay Thai, Fmean = mean impact force reported, Fmax = maximum impact force reported, \* = Extracted from figure
